# Supplementary material for: Toward artificial ion channels: self-assembled nanotubes from calix[4]arene–guanosine conjugates
Source: Royal Society of Chemistry journal article supplement (doi:10.1039/b007332f), 2000-01-01
Supplement: b007332f.doc [file b007332f.doc]

Supporting Information

For

**Toward Artificial Ion Channels:**

# Self-Assembled Nanotubes from Calix[4]arene-Guanosine Conjugates

Vladimir Sidorova, Frank W. Kotcha, Mahnaz El-Kouedib and Jeffery T. Davisa*

a) Department of Chemistry and Biochemistry, University of Maryland at College Park

College Park, MD 20742; Fax: 301-314-9121; [jd140@umail.umd.edu](mailto:jd140@umail.umd.edu)

b) Department of Chemistry, Georgetown University, Washington, D.C., 20057

**Experimental.**

**TEM.** Transmission electron microscopic characterization was performed using a JEOL 1200 EX TEM. Imaging was performed on copper mesh grids that were dipped into aqueous suspensions of the (G4-calix **1.**Na+)n. Samples were imaged on 200 Cu mesh formvar-coated grids (EM Sciences). A uranyl acetate stain was used to enhance contrast.

**Synthesis.** Scheme 1 on page 3 of this Supporting Information outlines the synthesis of G4-calix **1**. Calixarene compounds **4-6** were prepared according to literature procedures (Gutsche, C. D.; Iqbal, M. *Org. Synth*. **1990***, 68*, 234-237 (**4**), Gutsche, C. D.; Lin, L.-G.

*Tetrahedron*, **1986**, *42*, 1633-1640 (**5**);. Iwamoto, K.; Shinkai, S. *J. Org. Chem.* **1992**, *57*, 7066 (**6**)). The starting guanosine derivative **7** was purchased from Aldrich, and G intermediates **8**(Schattka, K.; Jastorff, B. *Chem. Ber.* **1972**, *105*, 3824), **9**and **2** (Stout, M.G.; Robins, M.J.; Olsen, R.K.; Robins, R.K. *J. Med.* *Chem.* **1969**, *12*, 658) were prepared according to literature procedures. Calixarene tetra-acid **3** was obtained by hydrolysis of tetraester **6** according to the following procedure:

**1,3-*alternate* calix[4]arene tetra-acid 3**. A solution of tetraester **6** (98 mg, 0.127 mmol) in a mixture of THF (3 mL), MeOH (3 mL), and aqueous KOH (1 mL, 40% weight) was stirred overnight at rt. The organic solvents were removed *in vacuo* at 70 oC, and the remaining aqueous solution was acidified to pH 1 by addition of 4 N HCl and allowed to stand at 0 oC for 6 h. The resulting precipitate was filtered, washed with water and dried at 80 oC. Additional tetra-acid **3** was extracted from aqueous solution with CH2Cl2. The resulting solids were combined and dried under vacuumn to give **3** as a white solid (65 mg, 0.099 mmole, 78%). 1H NMR (500 MHz, DMSO-d6, 25 oC):  12.21 (br s, 4 H), 7.07 (d, 8 H, J=7.5 Hz), 6.62 (t, 4 H, J=7.5 Hz), 4.03 (s, 8 H), 3.77 (s, 8 H).

**G4-1,3-*alternate* calix[4]arene tetra-amide 1.** To a solution of tetra-acid **3** (35 mg, 0.053 mmol) and amine **2** (0.27 mmol, 5.1 eq) in DMF (10 mL) at 0 oC was added EDCI (100 mg, 0.52 mmol, 10 eq). The reaction mixture was stirred for 20 min at 0 oC, DMAP (15 mg) was added, and the resulting reaction mixture was stirred at rt for 18 h. The solvent was removed *in vacuo* at 50 oC and the remaining oil was triturated with MeOH. The resulting white precipitate was isolated by centrifugation and washed twice with MeOH. Additional purification was accomplished by preparative TLC on microcrystalline cellulose plates (water:acetonitrile 24:76, Rf 0.3) to give G4-calixarene **1** as a white solid (55 mg, 0.029 mmole, 55%). 1H NMR (500 MHz, DMSO-d6, 25 oC):10.71 (br s, 1 H), 7.90 (s, 4 H), 7.07 (t, 4 H), 6.97 (d, 4 H, J= 7.5 Hz), 6.92 (d, 4 H, J=7.5 Hz), 6.58 (t, 4 H, J=7.5 Hz), 6.51 (br s, 8 H), 5.95 (d, 4 H, J=2.0 Hz), 5.18 (dd, 4 H, J=2.0, 7.9 Hz), 5.02 (m, 4 H), 4.15 (m, 4 H), 3.78 (s, 8 H), 3.74-3.49 (m, 8 H), 3.20 (br s, 8 H), 1.47 (s, 12 H), 1.28 (s, 12 H). FAB-MS m/z 1873.8 (M +1+ 29%), 1725.7 (M-guanine, 54%).

#
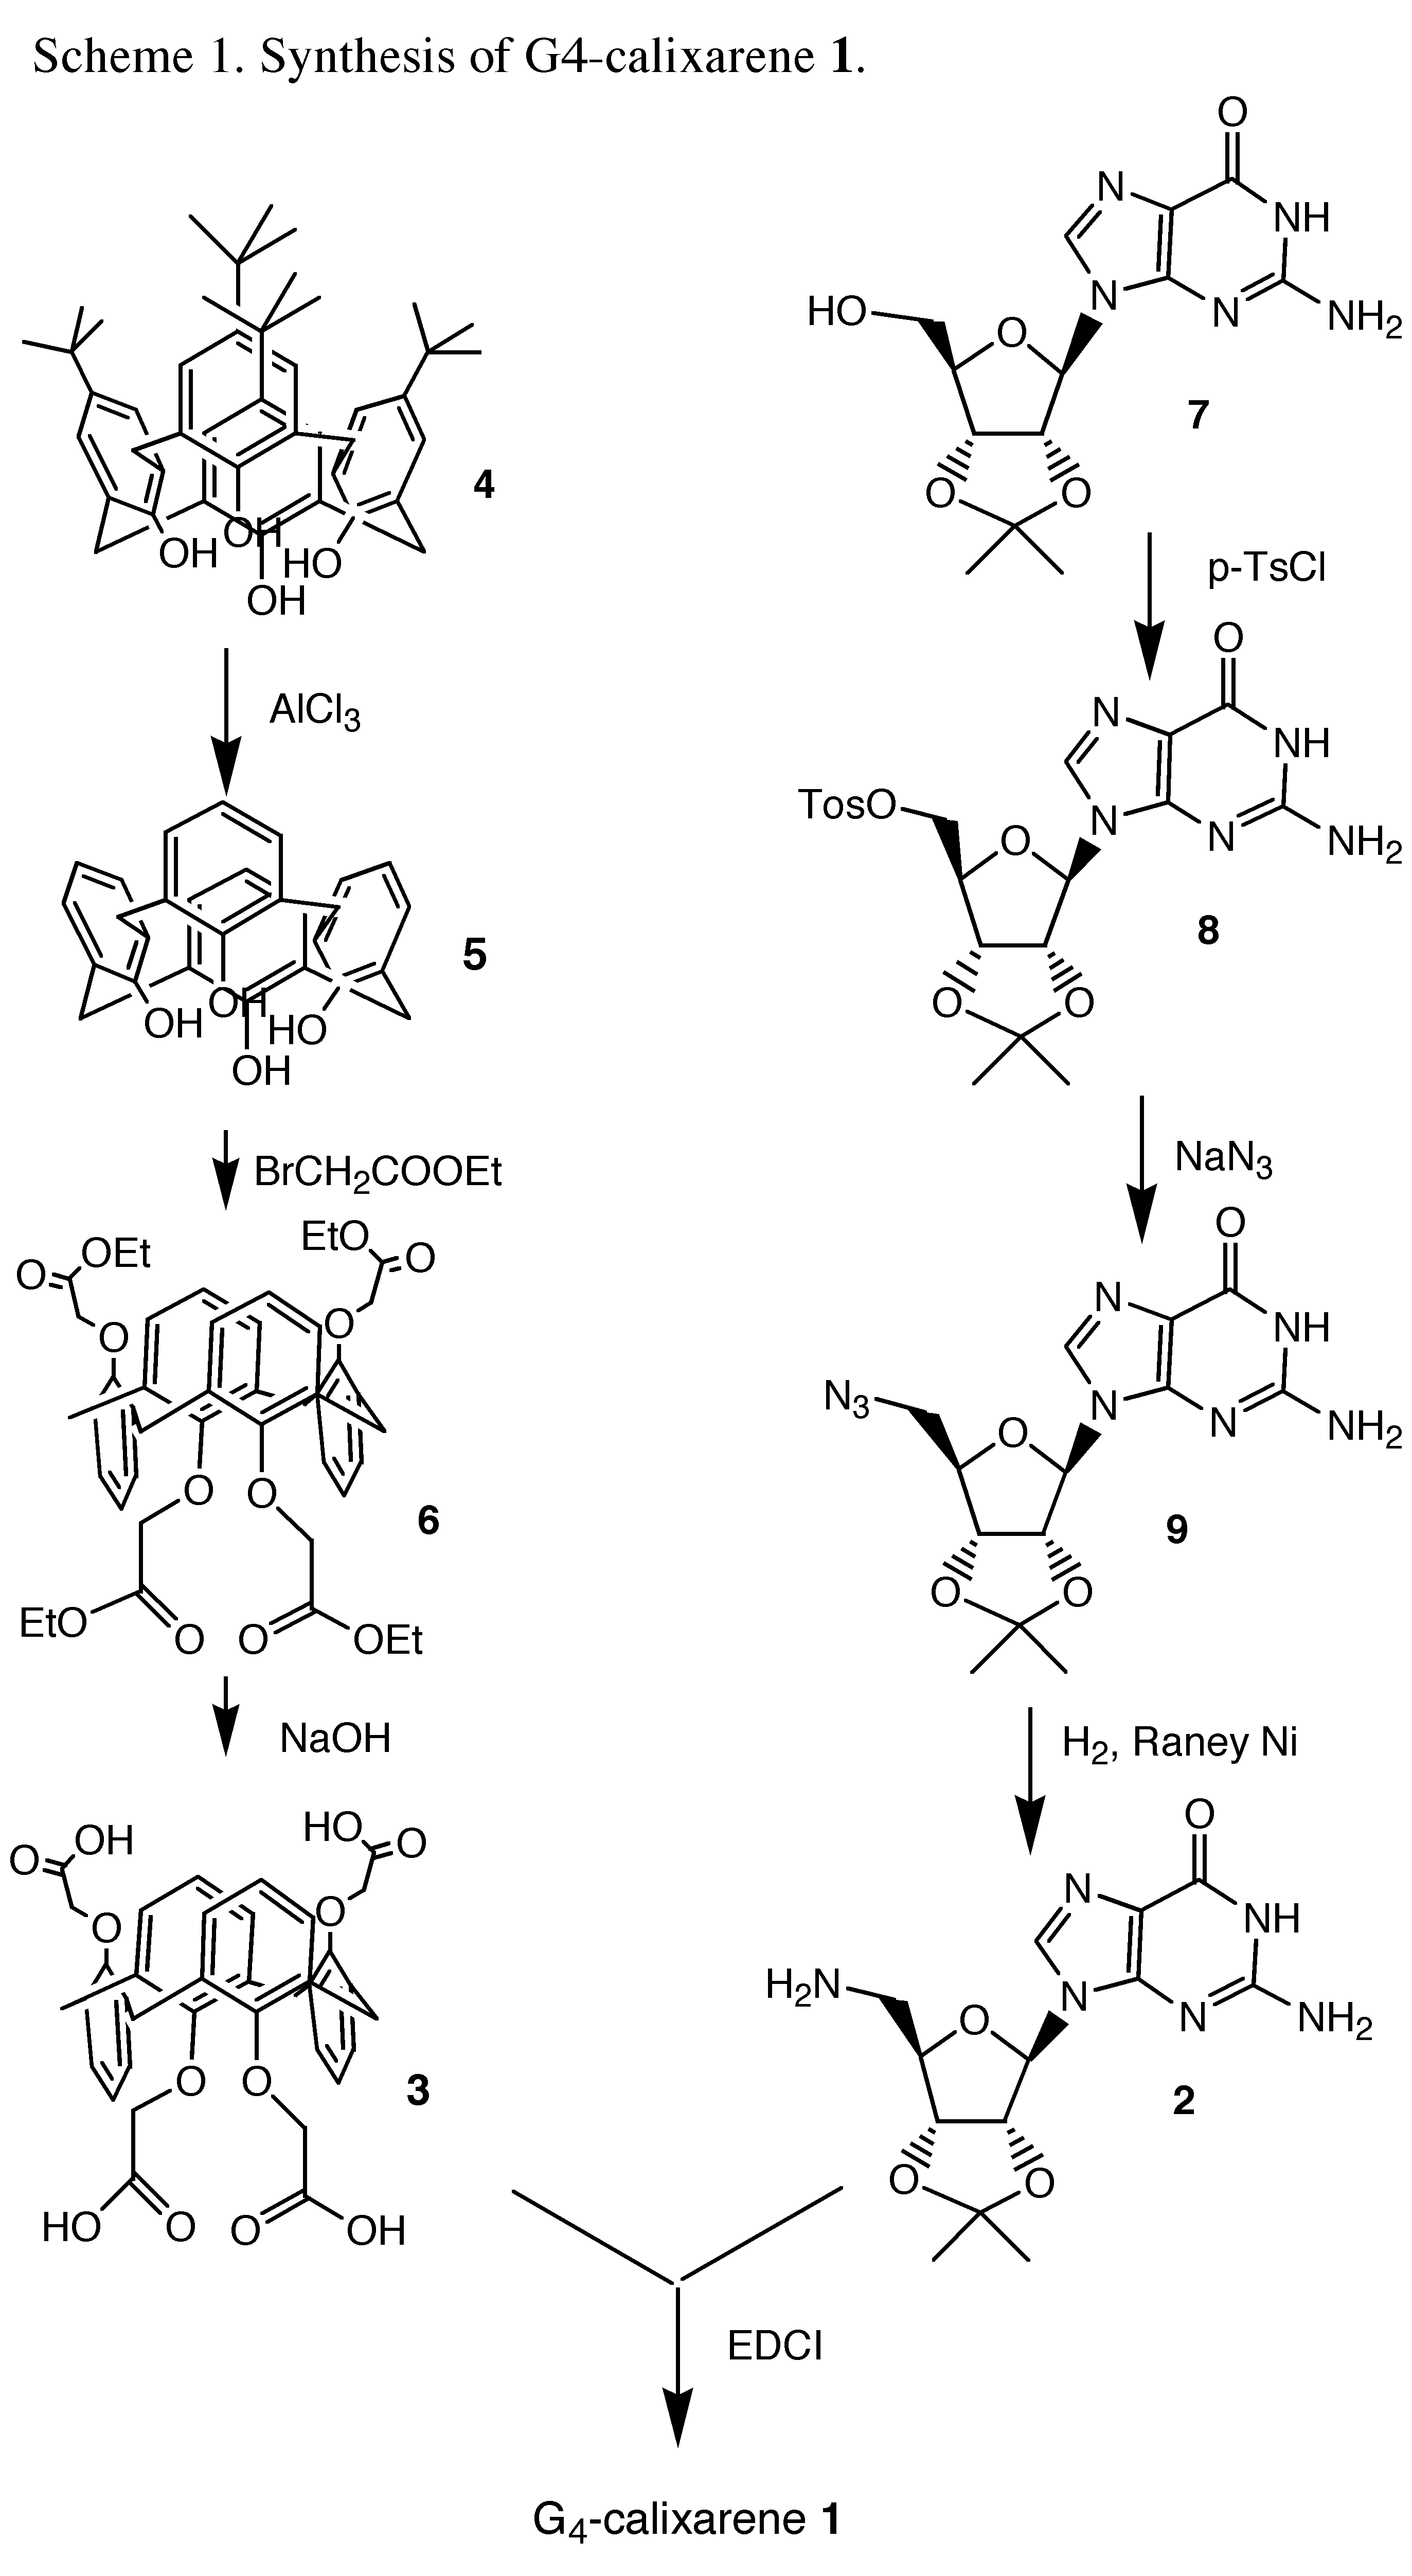


**1,3-*alternate* calix[4]arene tetramethylamide 11.**

The control calix[4]arene tetramethylamide 1,3-alternate **11** was prepared according to Scheme 2. **
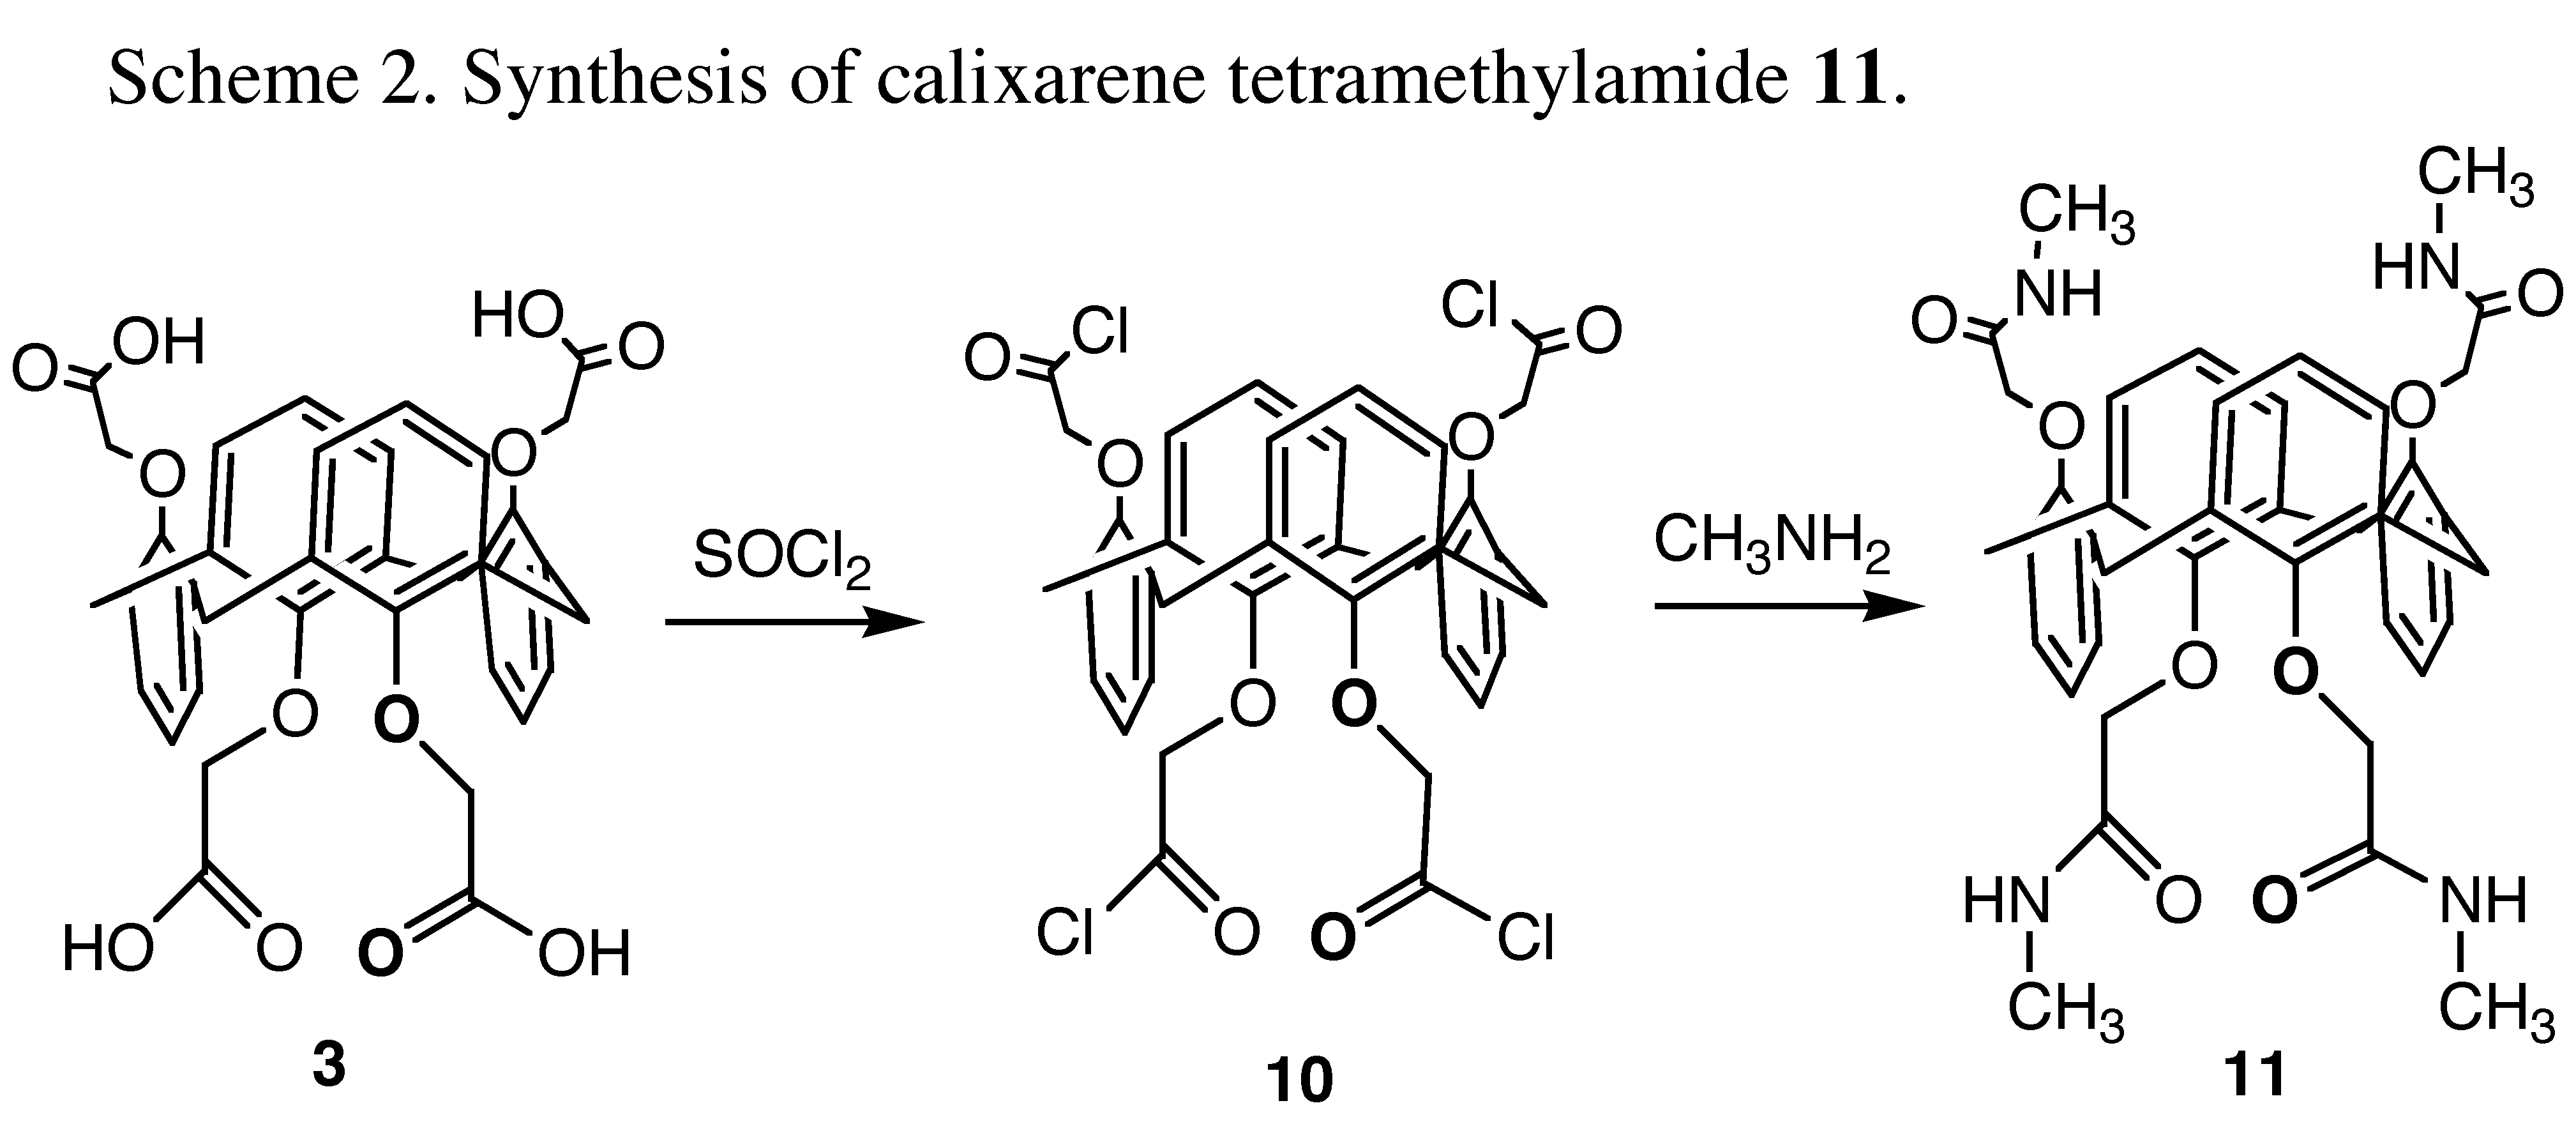
**

**1,3-*alternate* calix[4]arene tetra-acid chloride 10**.To a suspension of tetra-acid **3** (48 mg, 0.073 mmol) in benzene (3 mL) was added SOCl2 (1 mL). The reaction mixture was heated at reflux for 2.5 h, cooled to rt, and the solvent was removed *in vacuo*. Remnants of SOCl2were removed by co-evaporation with benzene (5 mL) to give the tetra-acyl chloride **10** (50 mg , 0.068 mmole, 94%), which was used immediately without further purification. 1H NMR (400 MHz, CDCl3) : 7.17 (d, 8 H, J=7.5 Hz), 6.95 (t, 4 H, J=7.5 Hz), 4.02 (s, 8 H), 3.98 (s, 8 H).

**1,3-*alternate* calix[4]arene tetramethylamide 11**. Aqueous methylamine (40% weight, 100 ml) was boiled to release methylamine gas which was then passed through two water traps, containing solid NaOH. The gas was bubbled through a solution of **10** (38 mg, 0.052 mmole) in CH2Cl2 (10 mL). After 2.5 hours at rt, the solution was concentrated

*in vacuo* and the residue was submitted to preparative TLC (silica gel, CHCl3:MeOH 9:1) to give **11** (22 mg, 0.031 mmole, 60% ) as a white solid. 1H NMR (CDCl3) : 7.04 (d, 8 H, J=7.5 Hz), 6.84 (t, 4 H, J=7.5 Hz), 5.79 (q, 4 H, J=4.8 Hz, NH), 4.07 (s, 8 H), 3.70 (s, 8 H), 2.88 (d, 12 H, J=4.8 Hz). See Figure 1 below for a 1D 1H NMR spectrum of 1,3-*alt-*calix[4]arene tetramethylamide **11** in 1:1 CH3CN:H2O solution, in the presence and absence of Na+.

**
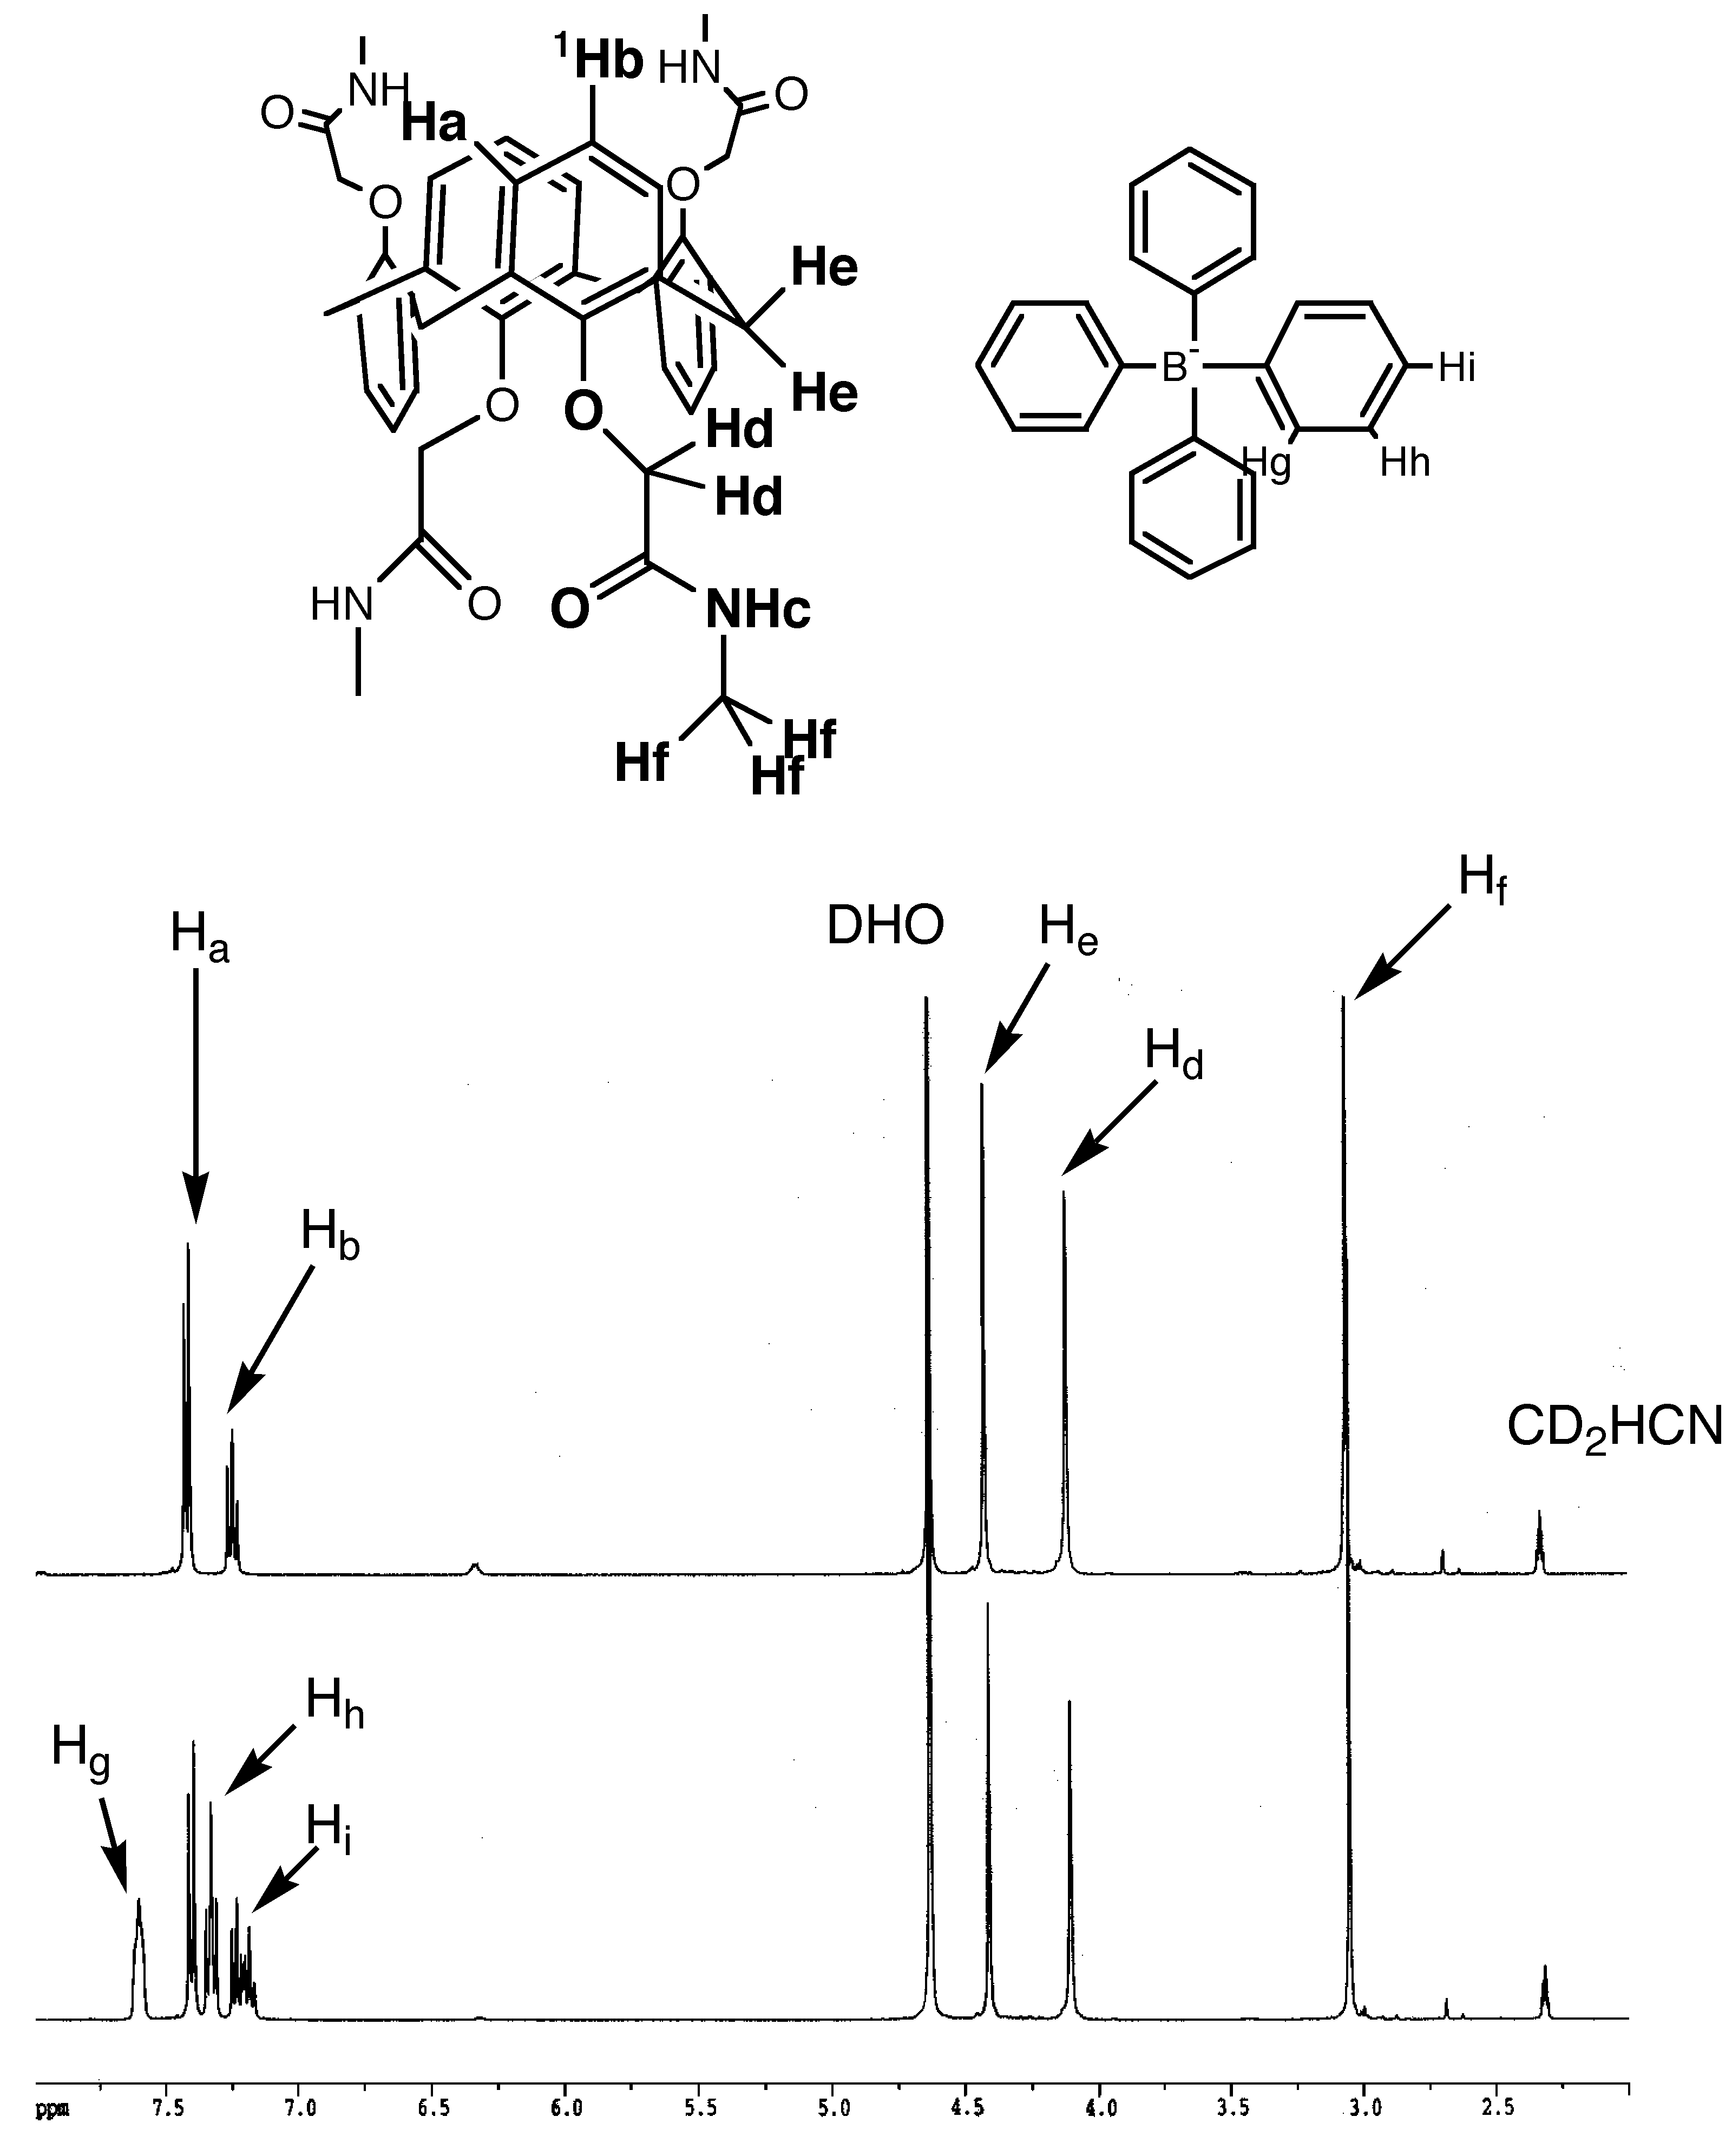
**

Figure 1. a) 1H NMR spectrum of 1,3-*alt-* calix[4]arene tetramethylamide **11** (8.5 mM) in a 1:1 D2O:CD3CN solution. b) 1H NMR spectrum of 1,3-*alt-* calix[4]arene tetra-methylamide **11** (8.5 mM) in a 1:1 D2O:CD3CN solution, after addition of 1 eq of NaBPh4. No significant changes occurred in the NMR spectrum of **11** upon Na+ addition.
